# Supplementary material for: Wheat breeding to better feed a growing world: historic insights and future potential elaborated using a diverse cultivars collection and extended phenotyping.
Source: Research Square preprint supplement (doi:10.21203/rs.3.rs-4523213/v1), 2024-06-25
Supplement: Supplementary file 1 [file 709b2579820f79c82cff652e.xlsx]

## Sheet: Tabelle1
Wheat breeding to better feed a growing world: historic insights and future potential elaborated using a diverse cultivars collection and extended phenotyping. Khaoula El Hassouni, Muhammad Afzal, Philipp H. G. Boeven, Jost Dörnte, Michael Koch, Nina Pfeiffer, Franz Pfleger, Matthias Rapp, Johannes Schacht, Monika Spiller, Malte Sielaff, Stefan Tenzer, Patrick Thorwarth, C. Friedrich H. Longin Su…
	Min	Mean	Max	Var G	Var E	Var GxE	Var err	H²
GY	76.9642	94.2253	108.022	29.84***	138.28***	11.13***	8.59095	0.891
PLH	68.318	84.5115	108.716	36.67***	73.69***	4.31***	7.38535	0.95
DTH	149.796	155.599	161.61	4.70***	33.43***	0.64***	1.67897	0.955
TW	72.1429	77.8917	82.0841	2.41***	15.29***	0.61***	1.46685	0.939383
TKW	35.3182	43.1607	51.0618	7.90***	29.86***	1.56***	1.54117	0.941696
Awns	0.537357	0.725691	1.7115	0.07***	0ns	9e-04ns	0.00626798	0.980894
Ldg	0.562838	1.54207	7.75748	0.50ns	0.03ns	0ns	1.6993	0.652012
YR	1.15664	2.76402	5.98098	0.6224***	1.5881***	0.315**	1.64926	0.764299
LR	0.98638	2.74565	6.70288	0.7368***	0.1006*	0.0985ns	1.26549	0.786476
Mildew	1.15656	1.77094	3.98301	0.0097**	0.3118*	0.0047ns	0.838113	0.668863
SEP	1.77958	3.30008	5.55412	0.2574***	3.6941***	0.3481***	0.752889	0.556129
FHB	1.46635	3.00917	5.32075	0.0487**	4.0552***	0.1755***	1.15497	0.64
Prot	10.6626	12.56	15.2586	0.4944***	0.5107***	0.0915***	0.0799682	0.919837
SDS	22.3169	46.4614	63.5485	56.9083***	146.6459***	9.1862***	10.2263	0.92684
FN	184.064	353.733	472.64	1645.7395***	824.9201**	315.1039ns	1303.69	0.830067
Hard	19.6155	36.991	48.4324	27.7441***	0ns	2.5777*	4.49713	0.938349
WI	-1.61665	92.915	95.2361	0.5204***	0ns	0.0582***	0.0567443	0.935591
YI	5.77456	10.1593	14.5016	2.0923***	0.0269ns	0.1082***	0.07629	0.973711
FE	35.6222	52.6852	59.8921	2.7168***	7.4391ns	0ns	15.8894	0.553461
Gluto	0.498011	5.57008	9.03177	1.9458***	0ns	0.4014**	0.53682	0.885654
WG	19.7829	27.6739	39.1578	10.6513***	7.3504**	1.1403*	2.35955	0.919565
PV	700.716	2410.67	3364.49	168214.8441***	72068.3952***	37791.0955***	42119	0.890507
TV	118.367	1342.69	1950.32	106848.2087***	63306.4904***	24523.7419***	28725.9	0.881797
Bd	552.64	1073.89	1408.67	14500.6803***	6293.6374*	3755.1475***	4351.98	0.871275
FV	273.228	2331.65	3254.85	232893.7286***	140178.8758***	53176.5155***	51603.4	0.896261
Sb	165.55	989.417	1306.8	26405.5919***	14966.226***	4269.6592***	8087.53	0.900391
PT	3.62516	5.94741	6.42685	0.0472***	0.0204*	0.0108***	0.0150455	0.879844
P.Temp	66.4848	72.4427	88.4126	25.7688***	8.7797*	11.2052**	21.6438	0.773019
TBM	7.48402	22.9513	43.5633	19.3833***	20.4601*	2.7604*	19.5713	0.841996
TM	5.72394	41.0124	59.8942	43.834***	49.9723***	4.7255***	3.23295	0.950098
PMT	28.1466	160.423	401.824	1156.8499***	2193.0503***	3e-04ns	1936.51	0.949272
TAM	5.33413	32.4742	48.6863	30.3326***	33.0105***	3.5935***	4.56633	0.92658
A-amylase	45.2864	50.0742	56.3387	0.0105***	0ns	NA	0.0238307	0.638743
WA	51.0338	56.9162	64.4148	4.7565***	2.1922***	0.4183***	0.462787	0.954719
YV	471.856	596.096	782.826	2438.1111***	2225.3429***	261.1626ns	855.059	0.900937
E90	26.1188	107.988	188.944	774.5908***	328.0227***	102.7667***	49.9892	0.950464
RES90	136.497	363.041	536.005	4665.7156***	753.4758*	861.5338**	1181.98	0.898992
EXT90	99.991	156.967	225.954	368.6965***	274.8722***	62.6301***	50.6495	0.927253
R90	0.886398	2.41978	4.98596	0.3149***	0.1443*	0.0905***	0.119338	0.874407
DT	1.24035	2.57871	9.58186	0.4125***	0.2456**	0.1825***	1.19171	0.753165
ST	1.30091	4.64306	10.3633	2.062***	1.8844***	0.5732***	1.15079	0.860008
SOF	-2.07082	12.0334	31.7898	20.466***	28.6015***	4.5326*	11.6246	0.833741
MTI	-0.594684	14.9776	37.8526	30.0142***	43.5409***	8.0467**	13.9811	0.838267
PE	1.80819	6.06932	21.907	3.4008***	2.6121**	0.3956ns	8.71551	0.802053
Ba	0.923133	2.66817	4.51457	0.44***	0.06***	NA	0.126237	0.932841
Ca	185.382	273.14	359.837	1102.48***	346.10***	NA	319.711	0.932404
Cu	2.44751	2.95516	3.61902	0.07***	0.14***	NA	0.119255	0.695259
Fe	22.4103	27.4886	31.9356	4.02***	8.68***	NA	4.29412	0.789336
K	3209.55	3747.35	4268.1	32620.94***	19131.6073***	NA	33703.2	0.794727
Mg	750.218	911.152	1079.84	3821.93***	4147.43***	NA	3364.74	0.819609
Mn	22.6564	27.456	32.4242	4.59***	17.19***	NA	5.92963	0.75602
P	2444.8	2849.8	3373.83	29250.84***	37801.72***	NA	30866	0.791262
S	1122.23	1221.84	1509.26	4945.87***	4790.03***	NA	10387.6	0.65571
Zn	19.7368	22.0402	27.5012	3.10***	76.12***	NA	7.4824	0.623773
Al	1.49356	1.73545	3.28372	0.11**	0.3513***	NA	1.23475	0.258341
Glycerol	0.480122	0.587662	0.748784	0.0046***	0.0525***	NA	0.021028	0.467238
Glucose	0.286803	0.329325	0.446813	0.0019**	0.001***	NA	0.0185749	0.289611
Fructose	0.344113	0.376375	0.449669	0.0015ns	0.0248***	NA	0.0307537	0.16429
Sucrose	4.72197	5.38447	6.19067	0.1929***	1.6714***	NA	0.85816	0.473394
Maltose	3.4151	4.46405	6.1211	0.4285***	0.4893***	NA	1.51176	0.531379
DP<8	28.5812	30.1542	32.2487	3.8615ns	83.044***	NA	126.482	0.10886
DP>8	16.1204	19.9182	26.208	7.0492***	9.0056***	NA	23.7234	0.543095
Total DP	45.2864	50.0742	56.3387	18.5509**	106.0591***	NA	214.83	0.25673
