# Supplementary material for: Wheat breeding to better feed a growing world: historic insights and future potential elaborated using a diverse cultivars collection and extended phenotyping.
Source: Research Square preprint supplement (doi:10.21203/rs.3.rs-4523213/v1), 2024-06-25
Supplement: Supplementary file 2 [file bde959761b18343ef197a893.xlsx]

## Sheet: Tabelle1
Wheat breeding to better feed a growing world: historic insights and future potential elaborated using a diverse cultivars collection and extended phenotyping. Khaoula El Hassouni, Muhammad Afzal, Philipp H. G. Boeven, Jost Dörnte, Michael Koch, Nina Pfeiffer, Franz Pfleger, Matthias Rapp, Johannes Schacht, Monika Spiller, Malte Sielaff, Stefan Tenzer, Patrick Thorwarth, C. Friedrich H. Longin Su…
Cultivar	Country of origin	Year of registration	Quality class
BUSSARD_1990	DE	1990	E
DEKAN	DE	1999	B
MAGNUS	DE	2000	A
ALTOS	DE	2000	E
KORUND	DE	2000	B
CUBUS	DE	2002	A
TOMMI	DE	2002	A
ELLVIS	DE	2002	A
AKTEUR	DE	2003	E
AKRATOS	DE	2004	A
TORAS	DE	2004	A
BUTEO	DE	2004	B
HERMANN	DE	2004	C
IMPRESSION	DE	2005	A
BRILLIANT	DE	2005	A
SCHAMANE	DE	2005	A
ANTHUS	DE	2005	B
MANAGER	DE	2006	B
POTENZIAL	DE	2006	A
LUCIUS	DE	2006	A
SKAGEN	DE	2006	E
INSPIRATION	DE	2007	B
JULIUS	DE	2008	A
TABASCO	DE	2008	C
JBASANO	DE	2008	A
ALADIN	CZ	2010	A
PRIMUS	DE	2009	B
ZAPPA	DE	2009	C
KREDO	DE	2009	B
NIC03-3463-B	DE	2011	B
KWSPIUS	DE	2010	A
FAMULUS	DE	2010	E
KWSERASMUS	DE	2010	C
MATRIX	DE	2010	B
ARKTIS	DE	2010	E
GENIUS	DE	2010	E
LINUS	FR	2011	A
MEISTER	DE	2010	A
ORCAS	DE	2010	B
SAILOR	DE	2010	A
EDGAR	DE	2011	A
BEDUIN	DE	2011	B
KALAHARI	DE	2010	A
LEAR	UK	2008	C
NELSON	DE	2011	E
KOMETUS	DE	2011	A
NIC05.4525.B	DE	2011	B
COLONIA	DE	2011	B
W05.1159	DE	2012	C
OPAL	DE	2011	A
NORIN	DE	2011	E
TOBAK	DE	2011	A
KWSVINCENT	DE	-	A
PATRAS	DE	2012	A
JOKER	DE	2012	A
BOMBUS	DE	2012	C
MENTOR	DE	2012	B
ATOMIC	DE	2012	B
FLORENCIA	DE	2015	B
NIC06.5210.A	DE	2012	B
CAPONE	DE	2013	B
ESTIVUS	DE	2012	B
ELIXER	DE	2012	C
KWSFERRUM	DE	2012	B
KWSDACANTO	DK	2011	B
ZEPPELIN	DE	2012	E
PIONIER	DE	2013	A
CONSUS	PL	2015	A
AVENIR	DE	2013	A
APIAN	DE	2013	B
GORDIAN	DE	2013	B
DESAMO	DE	2013	B
SU ANAPOLIS	DE	2013	C
EDWARD	DE	2013	B
NIC06.4370.A1	DE	2012	B
NIC06.4373.B1	DE	2012	B
MESCAL	DE	2013	B
KURT	DE	2013	B
RUMOR	DE	2013	A
KWSCOBALT	DE	2013	A
GOURMET	DE	2013	E
MEMORY	DE	2013	B
LANDSKNECHT	DE	2013	C
KWSMILANECO	DE	2013	E
KOMPASS	DE	2014	A
DICHTER	DE	2014	A
ATTRAKTION	DE	2014	A
DIANTHA	DE	2015	C
RGTREFORM	DE	2014	A
KWSDAKOTANA	DE	2014	B
KWSMAGIC	DE	2012	A
KWSLOFT	DE	2014	B
KWSMONTANA	DE	2014	E
KWSSMART	DE	2014	C
SPONTAN	DE	2014	A
AXIOMA	DE	2014	E
JOHNNY	DE	2014	B
FRANZ	DE	2014	A
BERNSTEIN	DE	2014	E
NIC06.4373.A	DE	2012	B
FRISKY	AT	2014	B
PRODUZENT	DE	2015	A
KWSMALIBU	PL	2015	B
KWSSALIX	DE	2015	B
BONANZA	DE	2015	B
MANITOU	DE	2015	B
GUSTAV	DE	2015	A
BENCHMARK	DK	2014	B
FAUSTUS	DE	2015	B
PONTICUS	DE	2015	E
HELMOND	DE	2015	E
ROCKEFELLER	DK	2016	C
HYVENTO	DE	2016	A
NIC09.6226.A	DE	2015	B
NIC09.6276.B	DE	2015	B
ALEXANDER	DE	2015	B
PARTNER	DE	2015	B
BARRANCO	DE	2016	E
DESIGN	DE	2016	A
SHERIFF	DE	2016	B
HALVAR	DE	2016	B
LGALPHA	DE	2016	C
NIC09.3262.A2	DE	2015	A
LGKOPERNIKUS	DE	2016	B
BOSPORUS	DE	2016	B
APOSTEL	DE	2016	A
PORTHUS	DE	2016	B
LEANDRUS	DE	2016	A
MOSCHUS	DE	2016	E
KWSMADDOX	DE	2016	B
KWSBARNY	DE	2016	B
KASHMIR	DE	2016	A
GALERIST	DE	2016	E
NORDKAP	DE	2016	A
JUMBO	DE	2017	B
ACHIM	DE	2017	A
BRUCE	DE	2017	B
KAMERAD	DE	2017	B
BOSS	DE	2017	B
RGTAKTION	DE	2017	A
RGTSACRAMENTO	DE	2017	B
KWSFINN	DE	2017	C
KWSTALENT	DE	2017	B
KWSETERNITY	DE	2017	E
ALCIDES	BE	2014	B
LGIMPOSANTO	DE	2017	A
NIC11.3185.A	DE	2017	A
LGMAGIRUS	DE	2017	E
NIC11.12536.D	DE	2017	B
BERYLL	DE	2017	E
SAFARI	DE	2017	C
EXPO	DE	2018	E
INFORMER	DE	2018	B
KWSEMERICK	DE	2018	E
KWSFONTAS	DE	2018	A
KWSTACTIC	DE	2018	B
KWSESSENZ	DE	2018	A
KW7007.3.12	DE	2018	C
ARGUMENT	DE	2018	B
VIKI	DE	2018	E
PURINO	DE	2018	E
WENDELIN	DE	2018	E
ASORY	DE	2018	A
CHAPLIN	DE	2018	E
LGMOCCA	DE	2018	C
LGINITIAL	DE	2018	A
RGTDEPOT	DE	2018	A
RGTRIFF	DE	2018	A
HYENA	DE	2018	B
LEMMY	DE	2018	A
HYMALAYA	DE	2018	A
APACHE	FR	1998	B
ARKEOS	FR	2011	C
ARMADA	FR	2012	C
LGABSALON	FR	2016	B
LGARMSTRONG	FR	2017	A
LGASCONA	FR	2017	A
TENOR	FR	2018	A
FRUCTIDOR	FR	2014	A
CELLULE	FR	2011	B
CHEVIGNON	FR	2017	B
MATHEO	FR	2012	A
RENAN	FR	1989	A
RUBISKO	FR	2011	A
SOISSONS	FR	1987	A
SOLEHIO	FR	2009	B
SYMOISSON	FR	2011	_
AREZZO	FR	2007	B
BATTALION	UK	2006	B
CORDIALE	UK	2000	A
CRUSOE	UK	2012	A
CUBANITA	UK	2015	_
EINSTEIN	UK	2008	A
GALLANT	UK	2010	A
KETCHUM	UK	2005	B
KWSCASHEL	UK	2013	_
KWSLILI	UK	2013	_
KWSZYATT	UK	2015	_
PANORAMA	UK	2007	A
RGTILLUSTRIOUS	_	2016	_
XI19	UK	_	_
SKYFALL	UK	2015	A
SOLSTICE	UK	2002	A
EVINA	DE	2012	E
JUDITA	CZ	2016	A
ARTIST	PL	2013	B
ELAN	CZ	2012	A
ANNIE	CZ	2014	_
JULIE	CZ	2013	_
DAGMAR	CZ	2012	A
MATCHBALL	CZ	2013	A
DRIFTER	DE	1999	A
CAPO	AT	1989	A
MOSKOVSKAJA39	RF	1999	E
BAGRATIONOVSKAYA	RF	1994	E
HEREWARD	UK	1989	B
PREMIO	FR	2007	A
ILIAS	NL	1993	A
FANION	FR	1978	B
RONSARD	FR	_	B
PEPIDOR	FR	2007	B
BUENNO	FR	2007	_
RIBBECKPZO	DE	2017	B
CHEVRON	FR	2009	_
AVALON	UK	1980	_
KANZLER	DE	1980	A
HERZOG	DE	1986	A
WATTINES	FR	1974	_
BOUNTY	UK	1979	_
REKTOR	DE	1981	A
BORENOS	DE	1987	E
ASTRON	DE	1989	A
ZENTOS	DE	1989	E
TÜRKIS	DE	2004	A
JUBILAR	DE	1961	B
DIPLOMAT	DE	1966	A
CARIBO	DE	1968	B
KRANICH	DE	1969	C
KORMORAN	DE	1973	A
CARIMULTI	DE	1975	_
DISPONENT	DE	1975	A
MARISHUNTSMAN	UK	1971	_
GÖTZ	DE	1978	B
KRAKA	DK	1981	A
SPERBER	DE	1982	A
ARES	DE	1983	B
APOLLO	DE	1984	C
ORESTIS	DE	1988	B
CONTRA	DE	1990	C
KONTRAST	DE	1990	A
ARON	DE	1992	A
TARSO	DE	1994	A
LUDWIG	AT	1997	A
ISENGRAIN	FR	1997	A
HAVEN	UK	1988	C
BUTARO	DE	2009	E
CARIBOU	FR	2006	A
INSTINCT	FR	2006	A
LIBERTA	HR	1997	_
MVZELMA	HU	2007	_
WIWA	CH	2005	E
CAMPESINO	DE	2019	B
ARCHITEKT	DE	2019	A
IKARUS	DE	2019	A
LGAKKURAT	DE	2019	A
LGVERTIKAL	DE	2019	B
SUAVENTINUS	DE	2019	A
SUSELKE	DE	2019	B
SYKONIKO	DE	2019	E
LGDITA	DE	2020	A
LGKERAMIK	DE	2019	A
LGAPOLLO	FR	2019	B
LGENPLUS	DE	2018	B
LGCAMBRIA	DE	2018	B
HENRIK	NL	2011	B
KEPLER	DE	2011	A
JANNE	DE	2013	B
LGORLICE	DE	2018	B
LGLUNARIS	DE	2020	C
LGEGMONT	DE	2018	B
PIKO	DE	1994	B
KWSEXTASE	FR	2017	B
