# Supplementary material for: Wheat breeding to better feed a growing world: historic insights and future potential elaborated using a diverse cultivars collection and extended phenotyping.
Source: Research Square preprint supplement (doi:10.21203/rs.3.rs-4523213/v1), 2024-06-25
Supplement: Supplementary file 3 [file c86caadcc3f19eb0d2a5cd88.xlsx]

## Sheet: Tabelle1
Wheat breeding to better feed a growing world: historic insights and future potential elaborated using a diverse cultivars collection and extended phenotyping. Khaoula El Hassouni, Muhammad Afzal, Philipp H. G. Boeven, Jost Dörnte, Michael Koch, Nina Pfeiffer, Franz Pfleger, Matthias Rapp, Johannes Schacht, Monika Spiller, Malte Sielaff, Stefan Tenzer, Patrick Thorwarth, C. Friedrich H. Longin Su…
	Traits	GY	PLH	DTH	TW	TKW	Ldg	Awns	YR	LR	Mildew	SEP	FHB	FE	WI	YI	Prot	SDS	FN	Gluto	Hard	WG	WA	YV	E90	RES90	EXT90	R90	DT	ST	SOF	MTI	PE	PV	TV	Bd	FV	SB	PT	P.Temp	TBM	TM	PMT	TAM	Ba	Ca	Cu	Fe	K
Agronomic traits	GY	1
	PLH	-0.172757	1
	DTH	-0.0432593	0.274131	1
	TW	-0.12297	0.404722	-0.0378478	1
	TKW	0.115412	0.258396	-0.00780743	0.139263	1
	Ldg	-0.225225	0.479578	-0.059426	0.0817015	0.087868	1
	Awns	-0.146399	-0.211993	-0.421147	0.0638361	-0.0251766	0.0423215	1
	YR	-0.088015	0.132611	0.0403431	-0.0171665	-0.0603207	0.145287	-0.100859	1
	LR	-0.181874	-0.0504048	-0.197063	0.00564585	0.0289842	0.0249785	-0.0807287	0.0544473	1
	Mildew	-0.262759	0.112371	-0.0146765	0.0751	-0.0340027	0.129593	0.0234269	0.300261	0.117789	1
	SEP	-0.383123	-0.217485	-0.374803	-0.036747	-0.107064	-0.0272925	0.231327	0.124962	0.212201	0.154611	1
	FHB	0.0924783	-0.289922	-0.220624	-0.382659	-0.0443408	-0.0361324	-0.0842056	0.137591	0.0664059	0.0987936	0.136827	1
Flour extraction rate	FE	0.18561	-0.144051	-0.0134811	0.0716305	0.0768277	-0.0810225	0.0470163	-0.265072	-0.0208374	-0.203336	0.0262129	-0.0418319	1
Chromameter	WI	-0.00671486	0.163578	0.110466	-0.165737	-0.0673248	0.0657144	-0.0830421	0.268625	0.00118701	0.23686	-0.0138468	0.0173658	-0.566512	1
	YI	0.131529	-0.279085	-0.0348282	0.0381269	-0.134146	-0.171113	-0.00344642	-0.213929	-0.00353031	-0.24877	0.00909456	-0.0318281	0.437185	-0.715717	1
Basic quality traits	Prot	-0.779247	0.254934	-0.0500756	0.343262	0.0696006	0.15816	0.118142	-0.0763088	0.181701	0.149565	0.266924	-0.142767	-0.119501	-0.101761	-0.108636	1
	SDS	-0.373843	0.122775	-0.167487	0.500547	0.0737474	0.0237901	0.0902396	-0.156117	0.129798	-0.113749	0.177874	-0.141384	0.288825	-0.482637	0.196208	0.592447	1
	FN	-0.0869991	0.00266851	0.00689266	0.20274	-0.0994007	-0.0832689	0.00683896	-0.0964091	0.0930484	-0.0857193	0.0113658	-0.0668401	0.0453188	-0.127103	0.0688706	0.247418	0.334778	1
Glutograph	Gluto	-0.343178	0.131835	-0.164003	0.476445	0.0237072	0.0487853	0.0880293	-0.0939999	0.0547187	-0.0352701	0.176421	-0.159928	0.0893411	-0.176009	0.0365821	0.580854	0.767109	0.220408	1
Hardness	Hard	-0.129033	0.0712247	-0.0633342	0.360734	0.0992915	0.0340594	0.0533152	-0.169486	-0.00131376	-0.165949	0.0252133	-0.101227	0.520158	-0.861721	0.536844	0.282609	0.617467	0.206663	0.289516	1
Wet gluten	WG	-0.552212	0.333571	0.186565	0.151724	0.0537529	0.158779	-0.0923753	0.00996342	0.140632	0.200788	0.0807356	-0.126638	-0.21247	0.125339	-0.215478	0.659021	0.0744	0.144806	0.00518631	0.0416394	1
Baking test	WA	-0.297313	0.059592	-0.0623647	0.349269	0.151837	0.054266	0.0575986	-0.154589	0.0778703	-0.165007	0.0817795	-0.0846854	0.22263	-0.645566	0.299727	0.456778	0.560341	0.329468	0.360547	0.698167	0.246064	1
	YV	-0.549394	0.251594	0.0235556	0.323607	0.0540157	0.165781	-0.0634213	-0.0671796	0.1563	-0.00944537	0.178015	-0.134085	0.0246802	-0.110878	-0.050209	0.738149	0.505752	0.263199	0.444994	0.338718	0.612695	0.504641	1
Extensograph	E90	-0.230655	0.032401	-0.235253	0.346377	-0.00683622	-0.0392317	0.22049	-0.111478	0.0337549	-0.0357509	0.226615	-0.126274	0.19939	-0.119697	-0.00767524	0.382786	0.745541	0.169395	0.739032	0.234175	-0.179502	0.0940433	0.184242	1
	RES90	0.220762	-0.0593057	-0.190841	0.0466073	-0.0654789	-0.121853	0.149676	0.0745472	-0.101273	-0.000108411	-0.00728739	-0.0234262	0.0128257	0.138919	-0.0645266	-0.170386	0.179653	0.0363503	0.350772	-0.181412	-0.554294	-0.327732	-0.447261	0.59256	1
	EXT90	-0.475337	0.133163	-0.0876168	0.379911	0.0672656	0.0783157	0.108511	-0.189543	0.127535	-0.0665456	0.253669	-0.104341	0.249121	-0.298087	0.0553592	0.634863	0.747904	0.197383	0.558283	0.503702	0.350961	0.45962	0.68569	0.618479	-0.219958	1
	R90	0.360674	-0.0751759	-0.0910427	-0.140838	-0.0600872	-0.112093	0.0852913	0.160798	-0.128189	0.025043	-0.118791	0.0341211	-0.172247	0.292297	-0.118803	-0.399486	-0.232452	-0.071147	0.00297348	-0.415673	-0.533206	-0.47029	-0.641997	0.131946	0.852354	-0.634791	1
Micro-doughLAB	DT	-0.0821656	0.0268672	-0.196224	0.270865	0.0214005	-0.0493476	0.23368	-0.0267519	0.0357227	-0.00173439	0.10694	-0.109835	0.119348	0.0289739	-0.0356457	0.216474	0.418093	0.139195	0.499546	0.0210821	-0.226552	-0.0569995	-0.035628	0.656914	0.506846	0.275112	0.232751	1
	ST	0.0213478	-0.0506715	-0.218508	0.202136	-0.0870553	-0.108265	0.204586	-0.0487607	0.0205193	-0.043664	0.105579	-0.0784139	0.116349	0.094334	-0.0381305	0.0563372	0.423028	0.0926411	0.520277	-0.0836149	-0.434331	-0.247339	-0.198763	0.750045	0.712973	0.185989	0.418525	0.769308	1
	SOF	-0.191023	0.0525944	0.191131	-0.0571481	0.103284	0.0966634	-0.121629	-0.0469578	0.0566511	-0.0198105	-0.0254267	-0.011313	0.0554807	-0.317548	0.16099	0.159612	-0.181502	-0.00770134	-0.329443	0.317071	0.509439	0.512721	0.332406	-0.5957	-0.767911	0.0500953	-0.580532	-0.576049	-0.855096	1
	MTI	-0.201867	0.0967421	0.194662	-0.0254808	0.0984808	0.123632	-0.120737	-0.0432587	0.05047	-0.021224	-0.0282674	-0.0229686	0.0390965	-0.310572	0.144023	0.184212	-0.167648	0.0157132	-0.315112	0.324627	0.544989	0.523127	0.362222	-0.585729	-0.775907	0.0752427	-0.600505	-0.579442	-0.852849	0.99082	1
	PE	-0.20891	0.060111	-0.228869	0.408043	0.0460407	-0.0238627	0.248101	-0.0643686	0.0762532	-0.0565821	0.144134	-0.134624	0.162166	-0.185986	0.0502901	0.38561	0.633699	0.260295	0.636926	0.265958	-0.133941	0.279609	0.163114	0.70814	0.386512	0.453537	0.0568244	0.898562	0.653605	-0.399856	-0.393702	1
RVA	PV	-0.0676067	0.0856213	0.0121474	0.202593	-0.110975	-0.0103087	0.0449844	-0.027958	0.0190084	-0.0552918	-0.0250545	-0.135564	-0.112182	0.163493	-0.137962	0.170845	0.224497	0.802017	0.235164	-0.048998	0.0956144	0.0817043	0.220989	0.228028	0.139868	0.155411	0.030706	0.180683	0.234774	-0.211055	-0.176305	0.217688	1
	TV	-0.0811451	0.0502888	0.0288357	0.215975	-0.119236	-0.0453078	0.0229695	-0.0602365	0.0505149	-0.0601547	-0.0281306	-0.119701	-0.077554	0.10074	-0.0685816	0.219351	0.252587	0.864179	0.268005	0.0074752	0.123025	0.162655	0.260574	0.214037	0.111592	0.1728	0.00230703	0.192293	0.194792	-0.145905	-0.114266	0.256892	0.964098	1
	Bd	0.00476278	0.132273	-0.0133244	0.0964526	-0.0512062	0.0432179	0.0598948	0.100715	-0.0454438	0.0197139	0.0156061	-0.111774	-0.177028	0.297689	-0.258717	-0.0127121	0.0659693	0.368765	0.0722972	-0.206694	-0.039158	-0.195147	0.0124349	0.21407	0.219497	0.0288743	0.134407	0.178485	0.303351	-0.354865	-0.330015	0.100443	0.730378	0.553744	1
	FV	-0.04003	0.0166952	0.0376415	0.186852	-0.140425	-0.0705405	0.0223618	-0.0691015	0.044714	-0.0842406	-0.0353833	-0.115006	-0.065494	0.086154	-0.0426208	0.154816	0.223554	0.861215	0.221375	-0.010893	0.0937215	0.133391	0.193084	0.192857	0.1224	0.132678	0.0319168	0.177336	0.202253	-0.16052	-0.130075	0.229189	0.955844	0.983391	0.555755	1
	SB	0.0299728	-0.0251418	0.062414	0.117398	-0.161612	-0.11131	-0.0181956	-0.0840247	0.0562805	-0.106784	-0.047662	-0.12258	-0.0410135	0.0654581	0.00841267	0.0356257	0.163907	0.796152	0.138272	-0.0462233	0.0390105	0.0763879	0.0682362	0.142254	0.14224	0.0505568	0.0922945	0.123984	0.196089	-0.16707	-0.145016	0.153902	0.875862	0.890191	0.521962	0.948968	1
	PT	-0.123328	0.0406969	0.00917345	0.140985	-0.0797052	-0.0187469	0.0487516	-0.0503779	0.00942083	-0.0815421	0.0245097	-0.0729888	-0.068429	0.0170208	-0.0454449	0.235192	0.253314	0.778305	0.25328	0.0745081	0.111223	0.230133	0.286929	0.20943	0.0716611	0.219234	-0.035325	0.156347	0.127477	-0.0665319	-0.0362024	0.242774	0.869603	0.884845	0.511416	0.876125	0.806282	1
	P.Temp	-0.138523	0.0764684	0.113419	-0.103565	-0.0352626	0.0632465	-0.0246186	0.149299	-0.00358135	0.220947	0.00682543	0.0844889	-0.484821	0.686565	-0.464747	0.0670379	-0.322374	-0.112232	-0.0391783	-0.637711	0.15354	-0.451996	-0.0687199	0.000844226	0.129539	-0.150148	0.220602	0.0972913	0.089858	-0.230352	-0.237078	-0.0497912	0.047365	0.0373008	0.0830778	0.0348989	0.0327979	0.0614804	1
Glutopeak	TBM	-0.379832	0.227928	-0.0370778	0.462119	0.143501	0.0715358	0.0518141	-0.124141	0.0878099	-0.0865551	0.0931742	-0.124901	0.145539	-0.345455	0.0330715	0.584515	0.767722	0.324368	0.598231	0.501913	0.239843	0.678574	0.549987	0.535428	-0.0110498	0.698406	-0.31915	0.27493	0.188831	0.022177	0.0466905	0.517649	0.220143	0.257087	0.03644	0.229206	0.157601	0.277136	-0.218193	1
	TM	-0.358122	0.137909	0.0691615	0.330093	0.137966	0.0572436	-0.070589	-0.142524	0.0928203	-0.0812913	0.0792781	-0.0772743	0.217591	-0.537628	0.270114	0.547371	0.551438	0.298949	0.375193	0.619517	0.395738	0.848878	0.600395	0.129279	-0.384471	0.559198	-0.569551	-0.062648	-0.265285	0.502254	0.520608	0.245058	0.0576848	0.149366	-0.213019	0.115946	0.0537599	0.224421	-0.344268	0.721387	1
	PMT	0.0693001	-0.0261936	-0.212473	0.148329	-0.0683579	-0.0644899	0.213667	0.0184226	-0.0463447	0.0458506	0.100287	-0.0716792	0.126774	0.120098	-0.0262704	-0.0914536	0.271018	-0.0406835	0.351083	-0.0925958	-0.483662	-0.373436	-0.345085	0.654553	0.709129	0.0705546	0.450574	0.534594	0.814336	-0.756672	-0.762815	0.430287	0.121323	0.0733579	0.2566	0.0835749	0.0944499	-0.00366029	0.10398	0.00421175	-0.351212	1
	TAM	-0.335028	0.128393	-0.00627602	0.409172	0.151713	0.0412868	-0.0373762	-0.152496	0.125379	-0.109915	0.1045	-0.0961826	0.247539	-0.523568	0.227826	0.544724	0.669894	0.336173	0.490476	0.626196	0.273884	0.856432	0.592876	0.296924	-0.242442	0.617512	-0.487439	0.0794512	-0.0887798	0.34004	0.357347	0.394612	0.136121	0.213618	-0.123625	0.174245	0.0973604	0.259142	-0.38239	0.842581	0.934425	-0.211333	1
Minerals	Ba	0.14756	-0.250761	-0.144898	-0.108901	0.0438517	-0.129694	0.353887	-0.0659265	-0.20444	-0.0521463	-0.000504313	0.0891995	0.152875	-0.0101812	-0.0274	-0.100615	-0.0794568	-0.196611	-0.0404418	0.000488678	-0.158152	-0.159202	-0.172853	0.0704753	0.13003	-0.0245044	0.112759	0.0925632	0.102147	-0.136093	-0.141112	0.0191108	-0.149335	-0.137506	-0.122566	-0.141748	-0.168518	-0.126266	0.0708921	-0.132135	-0.217505	0.118677	-0.199561	1
	Ca	-0.294751	0.00993609	-0.24175	-0.00777521	-0.241496	0.179093	0.406306	-0.00102605	-0.0346557	0.214564	0.128268	-0.0397959	-0.0558321	0.0410829	0.0138775	0.225006	0.0159294	-0.12333	0.0693754	0.00718917	0.0917059	-0.0983906	0.0584133	0.156764	0.0616777	0.115104	-0.0238567	0.147131	0.0812848	-0.0745097	-0.0652372	0.119096	-0.0320966	-0.0482608	0.036274	-0.0625421	-0.0822092	-0.0401936	0.161535	-0.0274458	-0.0762297	0.162541	-0.0858697	0.470833	1
	Cu	-0.330201	0.199658	0.0806909	0.114998	-0.00319832	0.0437805	-0.0891687	-0.0739232	-0.0177821	0.0782076	-0.0100711	-0.0897515	-0.15196	-0.106413	0.0394826	0.384413	0.156675	-0.0367681	0.113469	0.181578	0.28086	0.173022	0.263569	0.0853113	-0.156996	0.243957	-0.235681	-0.079511	-0.160569	0.191103	0.214622	-0.0022943	-0.0956295	-0.0732567	-0.140616	-0.108985	-0.148784	-0.0623564	0.0221478	0.204534	0.222184	-0.0920024	0.174397	0.0444918	0.145325	1
	Fe	-0.520638	0.226826	-0.0442525	0.341179	0.124314	0.0832578	0.0281586	0.0215989	0.136926	0.136887	0.137157	-0.213286	-0.172413	-0.0454978	-0.0830482	0.633941	0.376543	0.15393	0.405738	0.172789	0.355856	0.32129	0.461975	0.197353	-0.0953549	0.321084	-0.219639	0.164702	0.011187	0.117717	0.140838	0.28054	0.1118	0.122058	0.038703	0.0659998	-0.0122795	0.130547	0.0750695	0.353976	0.362049	-0.0229799	0.345156	-0.0753729	0.15798	0.404888	1
	K	0.120868	-0.279149	0.139063	-0.480577	-0.0981827	-0.124611	-0.216646	-0.00924153	0.000384322	-0.0818281	-0.0865896	0.178366	-0.0912729	-0.10627	0.160047	-0.256235	-0.235254	-0.224302	-0.290431	-0.0492693	-0.176053	-0.0410688	-0.197494	-0.234166	-0.0372177	-0.24372	0.0662424	-0.268711	-0.20443	0.138623	0.0940161	-0.299266	-0.331211	-0.347629	-0.160632	-0.318414	-0.21773	-0.224999	-0.0552596	-0.164421	-0.00607359	-0.189018	-0.0565236	-0.00309732	0.0273618	0.07634	-0.186205	1
	Mg	-0.55868	0.168795	-0.234574	0.305772	-0.00681676	0.177425	0.234329	0.114668	0.0835065	0.124949	0.273155	-0.147226	-0.190627	-0.0851341	-0.0600771	0.572234	0.380709	0.0328602	0.297793	0.24674	0.281162	0.25345	0.379506	0.26556	-0.0479313	0.375309	-0.187174	0.208296	0.0696728	0.00373917	0.0181306	0.298714	-0.0288615	-0.036099	0.0139688	-0.079552	-0.171138	-0.0276912	0.0367673	0.331347	0.236103	0.00234809	0.264182	0.0640843	0.362472	0.367473	0.464363	0.0548694
	Mn	-0.41645	0.216053	-0.0816089	0.293442	0.100007	0.130943	0.164953	0.0103485	0.00803569	0.156191	0.0671585	-0.117695	-0.117071	-0.0677868	-0.0606142	0.514408	0.293878	-0.0367549	0.288889	0.196554	0.344428	0.240118	0.363117	0.225997	-0.0625716	0.334836	-0.190213	0.115432	-0.0199838	0.0941558	0.119888	0.230487	-0.0194833	-0.046118	0.0465223	-0.0870515	-0.155459	-0.0109022	0.0884822	0.31788	0.26088	-0.0276357	0.264367	0.225089	0.486817	0.30208	0.484354	-0.111642
	P	-0.646941	0.236294	0.0110338	0.26934	-0.00298085	0.188736	-0.013355	0.0876536	0.167621	0.220043	0.188997	-0.107662	-0.260238	-0.0110137	-0.07051	0.690017	0.373597	-0.0206995	0.359187	0.195071	0.480259	0.283754	0.527149	0.221752	-0.152987	0.405872	-0.280379	0.0852425	-0.0526848	0.120264	0.134144	0.203449	-0.0812929	-0.0592506	-0.107271	-0.110913	-0.187624	-0.0221104	0.209694	0.35808	0.348588	-0.0867392	0.332623	0.0559603	0.343532	0.467925	0.548453	0.184357
	S	-0.627678	0.20006	-0.127737	0.322041	-0.055152	0.175781	0.120878	-0.0734274	0.149635	-0.0230549	0.212577	-0.12995	-0.150339	-0.0291932	-0.0544309	0.720516	0.48095	0.103559	0.494272	0.17903	0.387026	0.289836	0.62599	0.347941	-0.169305	0.571094	-0.377661	0.219805	0.141377	0.0362146	0.0645324	0.328425	0.144207	0.172241	-0.00989602	0.124799	0.0405501	0.167784	0.11215	0.484813	0.340728	0.0495655	0.371787	-0.0308618	0.253307	0.303368	0.504218	-0.224629
	Zn	-0.531647	0.316062	0.0573824	0.346463	0.119005	0.178499	0.035075	0.058812	0.0269582	0.224975	0.0632782	-0.210141	-0.176193	0.0250516	-0.132978	0.591967	0.269564	-0.0639458	0.300867	0.150013	0.465778	0.187417	0.409072	0.186937	-0.153121	0.350597	-0.258247	0.0660329	-0.05369	0.118231	0.150559	0.145951	-0.016793	-0.0288941	-0.00327385	-0.0855692	-0.170423	-0.0356037	0.0923269	0.300329	0.231746	-0.000511644	0.212968	0.0824648	0.283728	0.469653	0.59222	-0.124787
	Al	0.0152527	-0.0685637	-0.00227524	-0.0731983	-0.1052	-0.0417808	-0.0255192	-0.124175	0.0845646	-0.00860729	0.0376356	0.0387891	0.0267416	-0.141754	0.0810203	-0.0212271	0.0278903	-0.0436139	-0.0181586	0.0687086	-0.0293038	0.0659338	0.000645611	-0.00936786	-0.0536431	0.0526992	-0.0553709	-0.0396258	-0.0347127	0.0645542	0.0668525	-0.0622132	-0.0707668	-0.0741921	-0.0706586	-0.0626113	-0.0401879	-0.0315168	-0.0831482	0.0665199	0.0644316	-0.119517	0.0650837	0.106439	0.083884	0.0842264	0.0050722	0.190045
Sugars	Glycerol	0.0346401	-0.289018	-0.320295	-0.169279	-0.114721	-0.0506504	0.108694	-0.0228504	-0.0619316	-0.110446	-0.00386739	0.200293	0.0379981	-0.237978	0.167117	-0.0933497	0.0749532	-0.0247103	-0.0350004	0.192468	-0.268028	0.00102299	-0.113404	0.0502519	0.0667203	0.0113272	0.0105081	0.0353448	0.0685499	-0.0967892	-0.105986	0.0505307	-0.039802	-0.0613235	-0.0011649	-0.0397734	-0.00151107	0.0119364	-0.135987	-0.0469914	-0.0650488	0.0612041	-0.0458589	0.143266	0.153931	-0.0368603	-0.0459399	0.187718
	Glucose	0.044895	-0.12104	0.0958791	-0.170637	0.105642	-0.0119015	-0.103155	-0.0270813	0.0196667	-0.156144	-0.0427878	-0.0340959	0.115552	-0.189954	0.105003	-0.0639825	-0.110636	-0.198249	-0.158044	0.0779805	-0.0202566	0.072838	0.00627841	-0.210737	-0.214556	-0.08659	-0.133815	-0.201445	-0.261845	0.273284	0.25236	-0.161276	-0.286225	-0.2766	-0.255941	-0.262539	-0.210027	-0.218246	-0.124243	-0.0746121	0.0985559	-0.234245	0.0316633	0.0172284	-0.0642491	0.00254148	-0.0681112	0.170329
	Fructose	0.178201	-0.0557193	0.117888	-0.0803115	0.235318	-0.0289576	-0.103494	-0.0228988	-0.0835595	-0.10351	-0.126793	0.0168789	0.193887	-0.169634	0.102399	-0.100626	-0.0818414	-0.202063	-0.120407	0.108156	-0.0358857	0.0787341	-0.00545373	-0.204892	-0.144518	-0.106063	-0.064627	-0.204133	-0.252674	0.257724	0.236671	-0.148546	-0.299317	-0.270296	-0.263882	-0.276246	-0.232185	-0.171377	-0.0749204	-0.0668136	0.118558	-0.224973	0.0470624	0.0831779	-0.114683	-0.0247088	-0.0504515	0.0795975
	Sucrose	0.255098	-0.136581	0.0759614	-0.214647	0.229995	-0.0869844	0.0301114	-0.141253	-0.159977	-0.19106	-0.173863	0.0688913	0.226586	-0.24318	0.15981	-0.211656	-0.0859623	-0.175401	-0.170303	0.159574	-0.269795	-0.0272157	-0.161093	-0.0545988	-0.00324262	-0.0578702	0.00759678	-0.0610936	-0.0884233	0.0784558	0.0602253	-0.078846	-0.263153	-0.260706	-0.208643	-0.265877	-0.234274	-0.187664	-0.149568	-0.097386	-0.00761765	-0.0196041	-0.0183364	0.204002	0.0298775	0.0773336	-0.0852021	0.240487
	Maltose	0.16397	-0.082763	0.0880452	-0.110476	0.0952286	-0.0494494	-0.0354313	-0.0873149	-0.0760899	-0.27789	-0.0897581	-0.0544526	0.253362	-0.46717	0.310617	-0.161283	0.0229446	-0.205068	-0.145211	0.331283	-0.119515	0.24244	-0.09018	-0.149104	-0.115851	-0.0601629	-0.0626713	-0.192503	-0.233661	0.275579	0.262563	-0.0867903	-0.39772	-0.370569	-0.396818	-0.342651	-0.260654	-0.309477	-0.438384	0.0578332	0.200974	-0.204998	0.176708	-0.0463151	-0.184238	-0.0313442	-0.197076	0.259086
	DP<8	0.102667	-0.0906435	0.000560258	-0.161102	0.0078787	-0.0203574	0.125018	0.0568783	-0.322819	-0.0280079	0.083748	0.0778553	0.128493	-0.115013	0.0587387	-0.144833	-0.10537	-0.170983	-0.122094	0.0543144	-0.162704	-0.0893489	-0.141974	-0.047742	-0.00265374	-0.0581295	0.0134975	-0.0523432	-0.0522995	0.0243606	0.0267602	-0.0782248	-0.208103	-0.224495	-0.0820783	-0.215657	-0.240929	-0.195286	-0.0952179	-0.0783614	-0.0477415	0.00407099	-0.0662866	0.136484	0.043792	-0.0185405	-0.0972388	0.0523057
	DP>8	0.253152	-0.136457	0.149643	-0.257131	-0.0645713	-0.137842	-0.173125	0.186342	-0.301358	0.0610156	-0.00396125	0.243687	0.0349088	0.100814	-0.0581077	-0.310003	-0.261125	-0.101068	-0.221926	-0.166366	-0.141333	-0.211798	-0.165337	-0.158291	0.0440794	-0.201697	0.11258	-0.145439	-0.113413	-0.0108527	-0.0194506	-0.206351	-0.110492	-0.0970525	-0.0349687	-0.0868243	-0.0983008	-0.04801	0.121595	-0.192764	-0.113488	-0.0890594	-0.15215	0.180013	-0.0516597	-0.128515	-0.168767	0.116411
	Total DP	0.179151	-0.121366	0.0634063	-0.222027	-0.0219355	-0.0725555	0.0142678	0.119021	-0.353681	0.00663081	0.05735	0.158228	0.10423	-0.0373331	0.0159636	-0.232686	-0.18493	-0.163018	-0.179757	-0.0329256	-0.173996	-0.152358	-0.169559	-0.100751	0.0166754	-0.126341	0.057155	-0.0984267	-0.0845976	0.0122723	0.010326	-0.142297	-0.193075	-0.198899	-0.0725512	-0.188476	-0.211065	-0.157568	-0.0146263	-0.136412	-0.081668	-0.0353249	-0.110802	0.17219	0.00911393	-0.0675273	-0.139516	0.086374
A.amylase	A-amylase	-0.118511	0.0267842	0.044353	-0.161468	0.144411	0.0840304	-0.0978665	0.0911741	0.148964	0.0743693	4.68568e-05	0.0579351	-0.0973669	0.0476619	-0.0302364	0.0722942	-0.224597	-0.60912	-0.151352	-0.0635797	0.163864	0.00745623	-0.0136607	-0.278602	-0.279538	-0.0861406	-0.17395	-0.245932	-0.268576	0.331313	0.304063	-0.23019	-0.687314	-0.663575	-0.557849	-0.688513	-0.694817	-0.694415	0.00299714	-0.126555	0.0582302	-0.178912	-0.00813939	0.0296448	0.0325035	0.153909	0.0903952	0.237813
[truncated: 15 more columns]
