# Supplementary material for: Wheat breeding to better feed a growing world: historic insights and future potential elaborated using a diverse cultivars collection and extended phenotyping.
Source: Research Square preprint supplement (doi:10.21203/rs.3.rs-4523213/v1), 2024-06-25
Supplement: Supplementary file 4 [file f74f3826a5add0a6ba97f9ab.xlsx]

## Sheet: Tabelle1
Wheat breeding to better feed a growing world: historic insights and future potential elaborated using a diverse cultivars collection and extended phenotyping. Khaoula El Hassouni, Muhammad Afzal, Philipp H. G. Boeven, Jost Dörnte, Michael Koch, Nina Pfeiffer, Franz Pfleger, Matthias Rapp, Johannes Schacht, Monika Spiller, Malte Sielaff, Stefan Tenzer, Patrick Thorwarth, C. Friedrich H. Longin Su…
		Cultivar group
		Old (%)	Modern (%)	Recent (%)
Glu_A1	0	68.75	60.3774	52.809
	1	22.9167	35.8491	38.2022
	2*	8.33333	3.77358	6.74157
Glu_B1	7	4.16667	5.66038	2.80899
	20	2.08333	0	0
	13+16	2.08333	0	0
	14+15	0	5.66038	0.561798
	17+18	6.25	13.2075	8.98876
	23+18	0	0	0.561798
	6.2+18	0	0	2.80899
	6+8	33.3333	20.7547	25.2809
	7+8	18.75	5.66038	14.0449
	7+9	33.3333	49.0566	42.6966
Glu_D1	2+12	37.5	24.5283	35.9551
	3+12	2.08333	9.43396	6.17978
	5+10	60.4167	66.0377	55.618
